# Supplementary material for: Emerging investigator series: bacterial opportunistic pathogen gene markers in municipal drinking water are associated with distribution system and household plumbing characteristics
Source: Royal Society of Chemistry journal article supplement (doi:10.1039/d0ew00723d), 2020-01-01
Supplement: d0ew00723d3.xlsx [file d0ew00723d3.xlsx]

## Sheet: Sheet1
	Table S5. Details of each OP’s linear mixed-effect models, illustrating both the overall model and ANOVA output.
	Achromobacter							Burkholderia
	ANOVA OUTPUT							ANOVA OUTPUT
	Df Sum Sq Mean Sq F value Pr(>F) % Explained							Df Sum Sq Mean Sq F value Pr(>F) % Explained
	pp_mat 1 14.019270 14.0192702 27.249700 6.239317e-06 16.630608							iron 1 6.7430140 6.74301400 77.101024 8.887078e-11 18.126694
	iron 1 11.279840 11.2798395 21.924981 3.393068e-05 13.380910							Type 2 23.3699328 11.68496638 133.608335 3.533440e-18 62.823481
	S. maltophilia 1 34.245520 34.2455203 66.564102 5.820307e-10 40.624356							P.aeruginosa 1 3.2351063 3.23510629 36.990878 3.983930e-07 8.696672
	Orthophosphate 1 1.855890 1.8558897 3.607352 6.493918e-02 2.201582							nitrite 1 0.4404887 0.44048869 5.036639 3.056496e-02 1.184130
	water age 1 2.832984 2.8329840 5.506561 2.411919e-02 3.360678							Residuals 39 3.4108178 0.08745687 NA NA 9.169023
	Residuals 39 20.064498 0.5144743 NA NA 23.801867
	LINEAR MODEL OUTPUT							LINEAR MODEL OUTPUT
	(Log10+1 Achromobacter) = 1.749 +/- PP Material + (0.0128) x Iron + (1.107) x S. maltophilia - (0.146) x Orthophosphate + (0.011) x Water age							(Log10+1 Burkholderia) = 4.561 + (1.536x10-3) x Iron +/- Type + (0.482) x P. aeruginosa - (3.779) x Nitrite
	lm(formula = A ~ pp_mat + iron + S..maltophilia + Orthophosphate + water age, data = meta_table)							lm(formula = B ~ iron + Type + P.aeruginosa + nitrite, data = meta_table)
	Coefficients:							Coefficients:
	Estimate Std. Error t value Pr(>|t|)							Estimate Std. Error t value Pr(>|t|)
	(Intercept) 1.749459 0.266826 6.557 8.76e-08 ***							(Intercept) 4.560767 0.246619 18.493 < 2e-16 ***
	pp_matPlastic 0.354555 0.174977 2.026 0.0264 *							iron 0.001536 0.003376 0.455 0.65151
	pp_mat copper -0.354555 0.274977 -1.289 0.2049
	iron 0.012844 0.004906 2.618 0.0062 **							TypeHOT -1.419757 0.120990 -11.734 2.29e-14 ***
	S.maltophilia 1.107339 0.138749 7.981 1.00e-09 ***							TypePP -0.403232 0.128979 -3.126 0.00334 **
	Orthophosphate -0.146290 0.076549 -1.911 0.0634 .							P.aeruginosa 0.481592 0.079297 6.073 4.10e-07 ***
	water age 0.007458 0.003178 2.347 0.0241 *							nitrite -3.778953 1.683841 -2.244 0.03056 *
								---
	Signif. codes: 0 ‘***’ 0.001 ‘**’ 0.01 ‘*’ 0.05 ‘.’ 0.1 ‘ ’ 1							Signif. codes: 0 ‘***’ 0.001 ‘**’ 0.01 ‘*’ 0.05 ‘.’ 0.1 ‘ ’ 1
	Residual standard error: 0.7173 on 39 degrees of freedom							Residual standard error: 0.2957 on 39 degrees of freedom
	Multiple R-squared: 0.762, Adjusted R-squared: 0.7315							Multiple R-squared: 0.9083, Adjusted R-squared: 0.8966
	F-statistic: 24.97 on 5 and 39 DF, p-value: 3.377e-11							F-statistic: 77.27 on 5 and 39 DF, p-value: < 2.2e-16
	NTM							P. aeruginosa
	ANOVA OUTPUT							ANOVA OUTPUT
	Df Sum Sq Mean Sq F value Pr(>F) % Explained							Df Sum Sq Mean Sq F value Pr(>F) % Explained
	iron 1 0.4728051796 0.4728051796 41.271829 2.140481e-07 5.125682583							ct 1 1.5101790 1.5101790 8.893634 4.974646e-03 5.186995
	water age 1 0.1146122319 0.1146122319 10.004663 3.221691e-03 1.242511602							iron 1 2.7609792 2.7609792 16.259754 2.565231e-04 9.483105
	Pressure 4 0.1576987260 0.0394246815 3.441436 1.790457e-02 1.709612432							Burkholderia 1 10.8763901 10.8763901 64.052428 1.128107e-09 37.357017
	Type 2 8.0777196234 4.0388598117 352.557750 6.433533e-24 87.570586308							Type 2 7.0020830 3.5010415 20.618073 8.636639e-07 24.049977
	Total.16S 1 0.0004467565 0.0004467565 0.038998 8.445951e-01 0.004843288							ph 1 0.5125159 0.5125159 3.018271 9.043142e-02 1.760333
	Residuals 35 0.4009558530 0.0114558815 NA NA 4.346763786							Residuals 38 6.4525708 0.1698045 NA NA 22.162573
	LINEAR MODEL OUTPUT							LINEAR MODEL OUTPUT
	(NTM0.1) = 1.834 - (2.258x10-4) x Iron + (1.909x10-3) x Water age +/- Pressure District +/- Type + (1.977x10-2) x Total bacteria							(Log10+1 P. aeruginosa) = -0.581 + (2.237x10-5) x Ct + (5.480x10-3) x Iron + (0.949) x Burkholderia +/- Type - (0.257) x pH
	lm(formula = M ~ iron + water age + Pressure + Type + Total.16S, data = meta_table)							lm(formula = P ~ ct + iron + Burkholderia + Type + ph, data = meta_table)
	Coefficients:							Coefficients:
	Estimate Std. Error t value Pr(>|t|)							Estimate Std. Error t value Pr(>|t|)
	(Intercept) 1.8342541 0.7002602 2.619 0.01294 *							(Intercept) -5.809e-01 1.602e+00 -0.363 0.718946
	iron -0.0002258 0.0012401 -0.182 0.85659							ct 2.237e-05 2.231e-05 1.003 0.322352
	water age 0.0019090 0.0006274 3.043 0.00442 **							iron 5.480e-03 4.791e-03 3.059 0.001900 **
	PressureGravity -0.0330735 0.0467411 -0.708 0.48389							Burkholderia 9.498e-01 1.550e-01 6.126 3.82e-07 ***
	PressureNortheast_High -0.1097870 0.0479432 -2.290 0.02817 *							TypeHOT 1.138e+00 3.047e-01 3.734 0.000616 ***
	PressureSoutheast_High -0.1447115 0.0848226 -1.706 0.09686 .							TypePP 8.187e-01 1.637e-01 5.000 1.33e-05 ***
	PressureWest_High -0.0801342 0.0697992 -1.148 0.25873							ph -2.569e-01 1.479e-01 -1.737 0.090431 .
	TypeHOT -0.4830182 0.1357176 -3.559 0.00109 **							---
	TypePP 0.5388108 0.1164618 4.627 4.93e-05 ***							Signif. codes: 0 ‘***’ 0.001 ‘**’ 0.01 ‘*’ 0.05 ‘.’ 0.1 ‘ ’ 1
	Total.16S 0.0197689 0.1001061 0.197 0.84460
								Residual standard error: 0.4121 on 38 degrees of freedom
	Signif. codes: 0 ‘***’ 0.001 ‘**’ 0.01 ‘*’ 0.05 ‘.’ 0.1 ‘ ’ 1							Multiple R-squared: 0.7784, Adjusted R-squared: 0.7434
								F-statistic: 22.24 on 6 and 38 DF, p-value: 4.828e-11
	Residual standard error: 0.107 on 35 degrees of freedom
	Multiple R-squared: 0.9565, Adjusted R-squared: 0.9454
	F-statistic: 85.58 on 9 and 35 DF, p-value: < 2.2e-16
	S. maltophilia							Total bacteria
	ANOVA OUTPUT							ANOVA OUTPUT
	Df Sum Sq Mean Sq F value Pr(>F) % Explained							Df Sum Sq Mean Sq F value Pr(>F) % Explained
	iron 1 0.12223232 0.122232323 29.261088 3.418076e-06 14.122586							Monochloramine 1 29.317564 29.3175640 72.948916 3.514235e-10 2.6428045
	Home_age 1 0.05039623 0.050396225 12.064308 1.273479e-03 5.822723							Type 2 1052.359706 526.1798530 1309.257825 2.408296e-34 94.8639849
	Achromobacter 1 0.40306758 0.403067575 96.489992 4.233698e-12 46.569976							Burkholderia 1 7.283629 7.2836290 18.123363 1.414028e-04 0.6565759
	Burkholderia 1 0.10235811 0.102358114 24.503419 1.465866e-05 11.826342							Pressure 4 5.906336 1.4765840 3.674084 1.310744e-02 0.5324212
	copper 1 0.02454061 0.024540608 5.874755 2.009809e-02 2.835394							Residuals 36 14.468101 0.4018917 NA NA 1.30421
	Residuals 39 0.16291467 0.004177299 NA NA 1 8.822979
	LINEAR MODEL OUTPUT							LINEAR MODEL OUTPUT
	(S. maltophilia-0.1) = 1.262 + (2.113x10-4) x Iron - (4.927x10-4) x Home age + (4.711x10-2) x Achromobacter + (6.766x10-2) x Burkholderia + (2.306x10-3) x Copper							(Total bacteria1.6) = 15.798 - (1.796x10-1) x Monochloramine +/- Type + (1.164) x Burkholderia - Pressure
	lm (formula = S ~ iron + Home_age + Achromobacter + Burkholderia + copper, data = meta_table)							lm(formula = t ~ Monochloramine + Type + Burkholderia + Pressure, data = meta_table)
	Coefficients:							Coefficients:
	Estimate Std. Error t value Pr(>|t|)							Estimate Std. Error t value Pr(>|t|)
	(Intercept) 1.2619543 0.0659700 19.129 < 2e-16 ***							(Intercept) 15.7979 1.4376 10.989 4.72e-13 ***
	iron 0.0002113 0.0007682 0.275 0.7847							Monochloramine -0.1796 0.1901 -0.945 0.35088
	Home_age -0.0004927 -0.0000774 -6.366 0.0496 *							TypeHOT -4.3550 0.4955 -8.790 1.73e-10 ***
	Achromobacter 0.0471125 0.0102450 4.599 4.40e-05 ***							TypePP 5.7350 0.2735 20.970 < 2e-16 ***
	Burkholderia 0.0676627 0.0141895 4.768 2.59e-05 ***							Burkholderia 1.1648 0.2380 4.894 2.08e-05 ***
	copper 0.0023060 0.0009514 2.424 0.0201 *							PressureGravity -0.8506 0.2512 -3.385 0.00173 **
								PressureNortheast_High -0.8751 0.2660 -3.289 0.00225 **
	Signif. codes: 0 ‘***’ 0.001 ‘**’ 0.01 ‘*’ 0.05 ‘.’ 0.1 ‘ ’ 1							PressureSoutheast_High -0.5142 0.4176 -1.231 0.22621
								PressureWest_High -0.7501 0.4145 -1.810 0.07868 .
	Residual standard error: 0.08383 on 39 degrees of freedom
	Multiple R-squared: 0.6833, Adjusted R-squared: 0.6427							Signif. codes: 0 ‘***’ 0.001 ‘**’ 0.01 ‘*’ 0.05 ‘.’ 0.1 ‘ ’ 1
	F-statistic: 16.83 on 5 and 39 DF, p-value: 7.594e-09							Residual standard error: 0.6339 on 36 degrees of freedom
								Multiple R-squared: 0.987, Adjusted R-squared: 0.9841
								F-statistic: 340.5 on 8 and 36 DF, p-value: < 2.2e-16
